# Supplementary material for: Burdock-Derived Composites Based on Biogenic Gold, Silver Chloride and Zinc Oxide Particles as Green Multifunctional Platforms for Biomedical Applications and Environmental Protection
Source: Materials (Basel). 2023 Jan 29;16(3):1153. doi: 10.3390/ma16031153 (PMC9919592; doi:10.3390/ma16031153)
Supplement: Supplementary file 1 [file materials-16-01153-s001.zip › materials-2141730-supplementary.pdf]

# Burdock-Derived Composites Based on Biogenic Gold, Silver Chloride and Zinc Oxide Particles as Green Multifunctional Platforms for Biomedical Applications and Environmental Protection

Irina Zgura <sup>1,\*</sup>, Nicoleta Badea <sup>2,\*</sup>, Monica Enculescu <sup>1</sup>, Valentin-Adrian Maraloiu <sup>1</sup>, Camelia Ungureanu <sup>2</sup> and Marcela-Elisabeta Barbinta-Patrascu <sup>3,\*</sup>

<sup>1</sup> National Institute of Materials Physics, Atomistilor 405A, 077125 Magurele, Romania

<sup>2</sup> General Chemistry Department, Faculty of Chemical Engineering and Biotechnologies, University “Politehnica” of Bucharest, 1-7, Polizu Street, 011061 Bucharest, Romania

<sup>3</sup> Department of Electricity, Solid-State Physics and Biophysics, Faculty of Physics, University of Bucharest, 405 Atomistilor Street, P.O. Box MG-11, 077125 Magurele, Romania

\* Correspondence: irina.zgura@infim.ro (I.Z.); nicoleta.badea@upb.ro (N.B.); marcela.barbinta@unibuc.ro (M.-E.B.-P.)

**Table S1.** FT-IR bands assignment for vegetal extract and phyto-synthesized materials.

| Sample | FT-IR Bands<br>(cm <sup>-1</sup> ) | Assignment                                                                                                                                                                                                                                           | Ref. |
|--------|------------------------------------|------------------------------------------------------------------------------------------------------------------------------------------------------------------------------------------------------------------------------------------------------|------|
| EB     | 3321<br>(broad, strong)            | Normal “polymeric” OH stretch; bending and stretching vibrations of hydroxyl groups intermolecularly hydrogen bonded, in alcohols, polysaccharides and phenolic compounds/ polyphenols;<br>Stretching vibrations of the primary and secondary amines | [1]  |
|        | 2933 (weak)                        | C–H anti-symmetric stretching vibration                                                                                                                                                                                                              | [2]  |
|        | 2871 (weak)                        | C–H symmetrical stretch vibration of alkyl chains                                                                                                                                                                                                    | [2]  |
|        | 1608<br>(strong)                   | Amide I, arising due to carbonyl stretch in proteins; Carboxylate groups (–COO <sup>-</sup> ); Stretching C=C (aromatic ring); Primary amine, NH bend                                                                                                | [1]  |
|        | 1407<br>(strong)                   | Phenol or tertiary alcohol, OH bend                                                                                                                                                                                                                  | [2]  |
|        | 1260 (strong)                      | Primary or secondary, OH in-plane bend; Aromatic ethers, aryl–O stretch                                                                                                                                                                              | [2]  |

|    |         |                         |                                                                                                                                                                                                                                         |            |
|----|---------|-------------------------|-----------------------------------------------------------------------------------------------------------------------------------------------------------------------------------------------------------------------------------------|------------|
| Zn |         | 1108/ 1082<br>(strong)  | Secondary alcohol, C–O stretch;<br>Cyclic ethers, large rings, C–O stretch;<br>Antisymmetric stretching of –C–O group of polysaccharides and/or chlorophyll;<br>Secondary alcohol, C–O stretch;<br>C–O bending in esters; –C–O–C– ether | [1]<br>[2] |
|    |         | 767 (weak)              | Aliphatic chloro compounds, C–Cl stretch                                                                                                                                                                                                | [2]        |
|    |         | 613 (weak)              | Alcohol, OH out-of-plane bend                                                                                                                                                                                                           | [2]        |
|    | AuNPs   | 3325<br>(broad, strong) | O–H stretching alcohols, polysaccharides and phenolic compounds/ polyphenols;<br>Stretching vibrations of the primary and secondary amines                                                                                              | [1]        |
|    |         | 2933 (weak)             | C–H anti-symmetric stretching vibration                                                                                                                                                                                                 | [2]        |
|    |         | 2871 (weak)             | C–H symmetrical stretch vibration of alkyl chains                                                                                                                                                                                       | [2]        |
|    |         | 1617 (strong)           | Amide I, arising due to carbonyl stretch in proteins<br>Carboxylate groups (–COO–)<br>Stretching C=C (aromatic ring)<br>Primary amine, NH bend                                                                                          | [1]        |
|    |         | 1399 (strong)           | Carboxylates;<br>Phenol or tertiary alcohol, OH bend                                                                                                                                                                                    | [2]        |
|    |         | 1115 (strong)           | Alkyl-substituted ether; Primary and secondary alcohol, C–O stretch                                                                                                                                                                     | [2]        |
|    |         | 1020 (weak)             | Primary amine, C–N stretch;<br>Aliphatic phosphates (P–O–C stretch)                                                                                                                                                                     | [2]        |
|    |         | 993                     | Aromatic phosphates (P–O–C stretch)                                                                                                                                                                                                     | [2]        |
|    |         | 828                     | C–O– stretch; Aromatic C–H out-of-plane bend                                                                                                                                                                                            | [2]        |
|    |         | 767                     | Aliphatic chloro-compounds, C–Cl stretch                                                                                                                                                                                                | [2]        |
|    |         | 618 (medium)            | Alcohol, OH out-of-plane bend                                                                                                                                                                                                           | [2]        |
|    | AgCINPs | 3297                    | O–H stretching alcohols, polysaccharides and phenolic compounds/ polyphenols;<br>Stretching vibrations of the primary and secondary amines                                                                                              | [1]        |
|    |         | 2923                    | C–H anti-symmetric stretching vibration                                                                                                                                                                                                 | [2]        |
|    |         | 2848<br>(very weak)     | C–H symmetrical stretch vibration of alkyl chains                                                                                                                                                                                       | [2]        |
|    |         | 1595 (sharp,<br>strong) | Amide I, arising due to carbonyl stretch in proteins;<br>Carboxylate groups (–COO–)<br>Stretching C=C (aromatic ring)<br>Primary amine, NH bend                                                                                         | [1]        |
|    |         | 1355 (sharp,<br>strong) | Carboxylate (carboxylic acid salt)<br>Primary or secondary, OH in-plane bend<br>Phenol or tertiary alcohol, OH bend<br>Amide III band in proteins                                                                                       | [1]        |
|    |         | 1114 (sharp,<br>strong) | Alkyl-substituted ether; Primary and secondary alcohol, C–O stretch                                                                                                                                                                     | [2]        |
|    |         | 618 (weak)              | Alcohol, OH out-of-plane bend                                                                                                                                                                                                           | [2]        |
| O  |         | 3578-3018 (very         | Very broad intense band overlapping the frequencies of the following groups: Phe-                                                                                                                                                       | [1]        |

|       |                                |                                                                                                                                                                                                                                                                    |            |
|-------|--------------------------------|--------------------------------------------------------------------------------------------------------------------------------------------------------------------------------------------------------------------------------------------------------------------|------------|
|       | broad intense band)            | nols, OH stretch; Hydrogen-bonded O–H (the bending and stretching vibrations of hydroxyl groups in alcohols, polysaccharides and phenolic compounds)                                                                                                               | [2]        |
|       | 2127 (weak, broad)             | Transition metal carbonyls                                                                                                                                                                                                                                         | [2]        |
|       | 1580 (strong, narrow)          | Amide I, arising due to carbonyl stretch in proteins<br>Carboxylate groups ( $\text{--COO}^-$ )<br>Stretching $\text{C}=\text{C}$ (aromatic ring)<br>Primary amine, NH bend                                                                                        | [1]        |
|       | 1395 (strong, narrow)          | Carboxylates; Phenol or tertiary alcohol, OH bend; C–H bend                                                                                                                                                                                                        | [2]        |
|       | 1268 (strong, narrow)          | Primary or secondary, OH in-plane bend; Aromatic ethers, aryl–O stretch                                                                                                                                                                                            | [2]        |
|       | 1036 (medium)                  | Primary amine, CN stretch; Alkyl-substituted ether;<br>Aliphatic phosphates (P–O–C stretch)                                                                                                                                                                        | [2]        |
|       | 907 (weak)                     | Aromatic phosphates (P–O–C stretch)                                                                                                                                                                                                                                | [2]        |
|       | 545                            | Zn–O stretching vibration; hexagonal phase of ZnO                                                                                                                                                                                                                  | [3]<br>[4] |
| AuZnO | 3554-3034 (very broad, strong) | Very broad intense band overlapping the frequencies of the following groups:<br>Nonbonded hydroxyl groups, Phenols, OH stretch; Hydrogen-bonded O–H (the bending and stretching vibrations of hydroxyl groups in alcohols, polysaccharides and phenolic compounds) | [1]<br>[2] |
|       | 2976-2875 (weak, broad)        | C–H anti-symmetric stretching vibration;<br>C–H symmetrical stretch vibration of alkyl chains                                                                                                                                                                      | [2]        |
|       | 2127 (very weak)               | Transition metal carbonyls<br>$\text{C}\equiv\text{C}$ stretch                                                                                                                                                                                                     | [2]        |
|       | 1585 (strong, sharp)           | Amide I, arising due to carbonyl stretch in proteins<br>Carboxylate groups ( $\text{--COO}^-$ )<br>Stretching $\text{C}=\text{C}$ (aromatic ring)<br>Primary amine, NH bend                                                                                        | [1]<br>[2] |
|       | 1381 (strong, sharp)           | Carboxylates; Phenol or tertiary alcohol, OH bend; C–H bend                                                                                                                                                                                                        | [2]        |
|       | 1034 (strong, sharp)           | Primary amine, C–N stretch;<br>Primary alcohol, C–O stretch<br>Alkyl-substituted ether, C–O stretch                                                                                                                                                                | [2]        |
|       | 907 (medium)                   | Aromatic phosphates (P–O–C stretch)                                                                                                                                                                                                                                | [2]        |
|       | 750 (shoulder)                 | Aliphatic chloro compounds, C–Cl stretch                                                                                                                                                                                                                           | [2]        |
|       | 708 (weak)                     | Aliphatic chloro compounds, C–Cl stretch<br>Alcohol, OH out-of-plane bend                                                                                                                                                                                          | [2]        |
|       | 694                            | Zn–O stretching vibration; hexagonal phase of ZnO                                                                                                                                                                                                                  | [3]<br>[4] |

|           |                                   |                                                                                                                                                                                                                                                                                                                            |            |
|-----------|-----------------------------------|----------------------------------------------------------------------------------------------------------------------------------------------------------------------------------------------------------------------------------------------------------------------------------------------------------------------------|------------|
| AgClZnO   | 3605-2923<br>(very broad, strong) | Very broad intense band overlapping the frequencies of the following groups:<br>Phenols, OH stretch; Hydrogen-bonded O–H (the bending and stretching vibrations of hydroxyl groups in alcohols, polysaccharides and phenolic compounds);<br>C–H anti-symmetric stretching vibration                                        | [1]<br>[2] |
|           | 2127<br>(weak, broad)             | Transition metal carbonyls                                                                                                                                                                                                                                                                                                 | [2]        |
|           | 1499 (strong)                     | Amide II band in proteins                                                                                                                                                                                                                                                                                                  | [5]        |
|           | 1388 (strong)                     | Carboxylates; Phenol or tertiary alcohol, OH bend; C–H bend                                                                                                                                                                                                                                                                | [2]        |
|           | 1071 (very weak)-<br>1021         | Primary amine, C–N stretch;<br>Primary alcohol, C–O stretch;<br>Alkyl-substituted ether, C–O stretch;<br>Secondary alcohol, C–O stretch;<br>Cyclic ethers, large rings, C–O stretch;<br>Antisymmetric stretching of –C–O group of polysaccharides;<br>Secondary alcohol, C–O stretch; C–O bending in esters; –C–O–C– ether | [1]<br>[2] |
|           | 734<br>(medium)                   | Aliphatic chloro compounds, C–Cl stretch                                                                                                                                                                                                                                                                                   | [2]        |
|           | 704<br>(very weak)                | Aliphatic chloro compounds, C–Cl stretch; Disulfides (C–S stretch)                                                                                                                                                                                                                                                         | [2]        |
|           | 555 (weak)                        | Alcohol, OH out-of-plane bend                                                                                                                                                                                                                                                                                              | [2]        |
| AuAgClZnO | 519                               | Zn–O stretching vibration; hexagonal phase of ZnO                                                                                                                                                                                                                                                                          | [3]<br>[4] |
|           | 3604-2923<br>(very broad, strong) | Very broad intense band overlapping the frequencies of the following groups:<br>Nonbonded hydroxyl groups, Phenols, OH stretch; Hydrogen-bonded O–H (the bending and stretching vibrations of hydroxyl groups in alcohols, polysaccharides and phenolic compounds); C–H anti-symmetric stretching vibration                | [1]<br>[2] |
|           | 2132<br>(weak, broad)             | Transition metal carbonyls                                                                                                                                                                                                                                                                                                 | [2]        |
|           | 1790<br>(very weak)               | Amide I, arising due to carbonyl stretch in proteins<br>Carboxylate groups (–COO–)                                                                                                                                                                                                                                         | [2]<br>[6] |
|           | 1595, broad weak                  | Amide I, arising due to carbonyl stretch in proteins<br>Carboxylate groups (–COO–)<br>Stretching C=C (aromatic ring)<br>Primary amine, NH bend                                                                                                                                                                             | [1]<br>[2] |
|           | 1379,<br>(broad, medium)          | Carboxylates; Phenol or tertiary alcohol, OH bend; C–H bend                                                                                                                                                                                                                                                                | [2]        |

|                           |                                                                                                                                                                                                                                                                                                                               |            |
|---------------------------|-------------------------------------------------------------------------------------------------------------------------------------------------------------------------------------------------------------------------------------------------------------------------------------------------------------------------------|------------|
| 1075-1025 (weak bands)    | Primary amine, C–N stretch;<br>Primary alcohol, C–O stretch;<br>Alkyl-substituted ether, C–O stretch;<br>Secondary alcohol, C–O stretch;<br>Cyclic ethers, large rings, C–O stretch;<br>Antisymmetric stretching of –C–O group of polysaccharides;<br>Secondary alcohol, C–O stretch;<br>C–O bending in esters; –C–O–C– ether | [1]<br>[2] |
| 798; 735; 697 (very weak) | Aliphatic chloro compounds, C–Cl stretch                                                                                                                                                                                                                                                                                      | [2]        |
| 559 (very weak)           | Zn–O stretching vibration; hexagonal phase of ZnO                                                                                                                                                                                                                                                                             | [3]<br>[4] |

## References

1. Barbinta-Patrascu, M.E.; Chilom, C.; Nichita, C.; Zgura, I.; Iftimie, S.; Antohe, S. Biophysical insights on Jack bean urease in the presence of silver chloride phytonanoparticles generated from *Mentha piperita* L. leaves, *Rom.Rep.Phys.*, **2022**, 74, 605.
2. Coates, J. Interpretation of Infrared Spectra, a Practical Approach. In *Encyclopedia of Analytical Chemistry*; Meyers, R.A., Eds.; John Wiley & Sons Ltd: Chichester, UK, 2000, pp. 1-23.
3. Jankovic, S.; Milisavic, D.; Okolic, T.; Jelic, D. Synthesis of ZnO-Ag nanoparticles by sol-gel method. *Contemp. Mater.* **2019**, 10, 22–27.
4. Rahman, F.; Majed Patwary, M.A.; Bakar Siddique, M.A.; Bashir, M.S.; Haque, M.A.; Akter, B.; Rashid, R.; Haque, M.A.; Royhan Uddin, A.K.M. Green synthesis of zinc oxide nanoparticles using *Cocos nucifera* leaf extract: characterization, anti-microbial, antioxidant and photocatalytic activity. *R. Soc. Open Sci.* **2022**, 9, 220858.
5. Ji, Y.; Yang, X.; Ji, Z.; Zhu, L.; Ma, N.; Chen, D.; Jia, X.; Tang, J.; Cao, Y. DFT-Calculated IR Spectrum Amide I, II, and III Band Contributions of N-Methylacetamide Fine Components. *ACS Omega*. **2020**, 5, 8572-8578.
6. Barbinta-Patrascu, M. E.; Nichita, C.; Badea, N.; Ungureanu, C.; Bacalum, M.; Zgura, I.; Iosif, L.; Antohe, S. Biophysical aspects of bio-nanosilver generated from *Urtica dioica* Leaves and *Vitis vinifera* fruits' extracts, *Rom. Rep. Phys.* **2021**, 73, 601.
